# Supplementary material for: pH-Dependent isotope exchange and hydrogenation catalysed by water-soluble NiRu complexes as functional models for [NiFe]hydrogenases
Source: Royal Society of Chemistry journal article supplement (doi:10.1039/b807555g), 2008-01-01
Supplement: b807555g.pdf [file b807555g.pdf]

Electronic Supplementary Information (ESI) for

**pH-dependent isotope exchange and hydrogenation  
catalysed by water-soluble NiRu complexes as functional  
models for [NiFe]hydrogenases**

Bunsho Kure, Takahiro Matsumoto, Koji Ichikawa, Shunichi Fukuzumi, Yoshiki Higuchi,  
Tatsuhiko Yagi, and Seiji Ogo\*

\*To whom correspondence should be addressed. E-mail: ogo-tcm@mbox.nc.kyushu-u.ac.jp

**This PDF file includes:**

Figs. S1 to S5

## A Table of Contents

|                                                                                       |        |
|---------------------------------------------------------------------------------------|--------|
| Fig. S1, ESI mass spectra of <b>2</b>                                                 | page 3 |
| Fig. S2, IR spectra of <b>2</b>                                                       | page 4 |
| Fig. S3, <sup>1</sup> H NMR spectrum of <b>4</b> in H <sub>2</sub> O at pH 9 at 23 °C | page 5 |
| Fig. S4, pH-dependent profile of TOFs for the hydrogenation of glyoxylic acid         | page 6 |
| Fig. S5, XPS of <b>1</b> , <b>2</b> , and <b>3</b>                                    | page 7 |

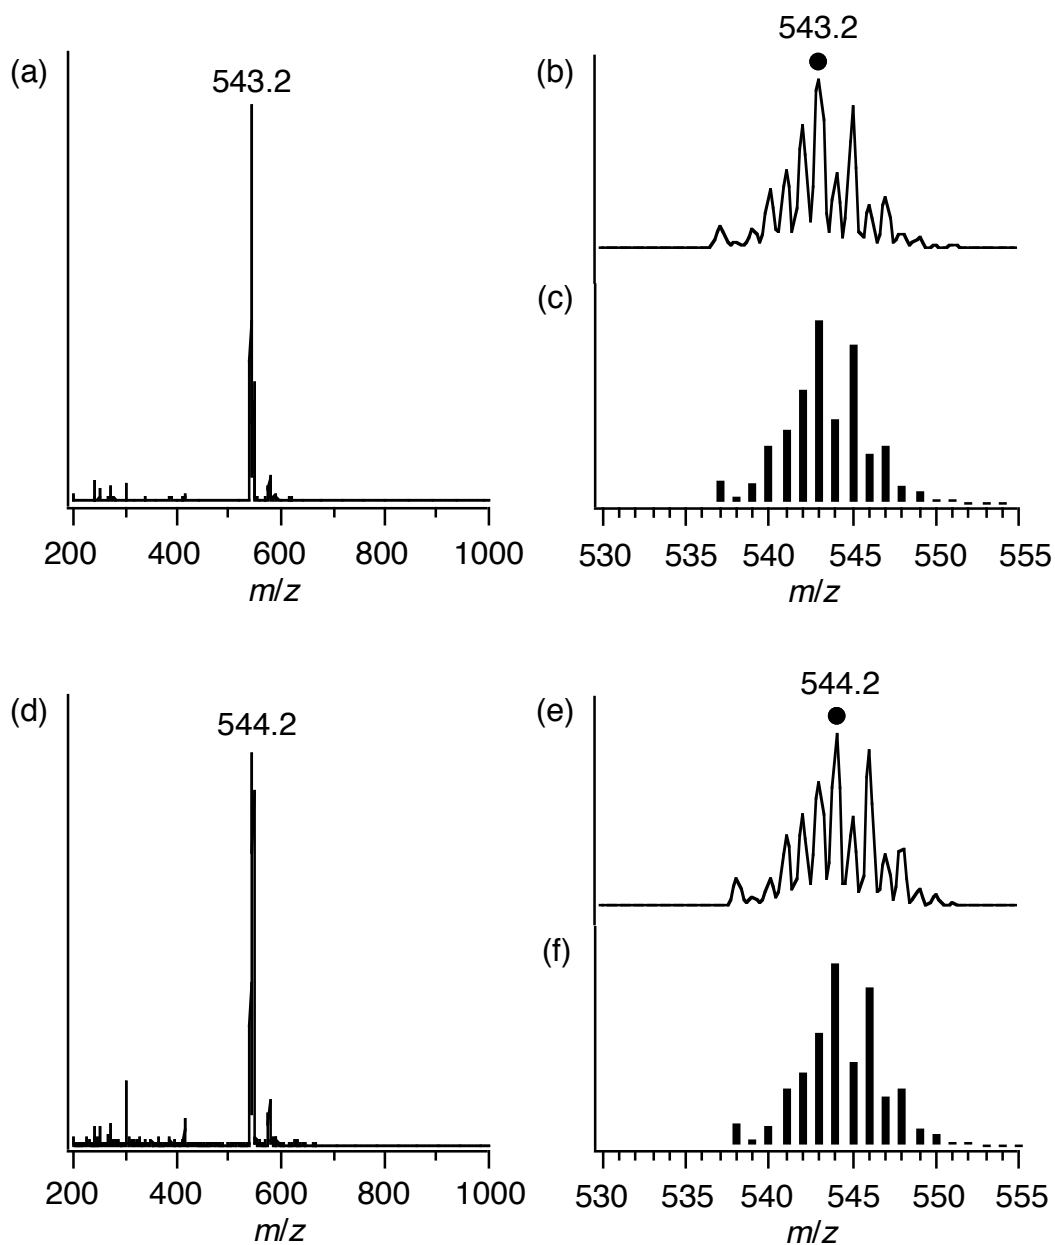

**Fig. S1.** (a) Positive-ion ESI mass spectrum of  $[2](NO_3)$  in  $H_2O$  (pH 5). (b) Signal at  $m/z$  543.2 for  $[2 - H_2O]^+$ . (c) Calculated isotopic distribution for  $[2 - H_2O]^+$ . (d) Positive-ion ESI mass spectrum of  $[D\text{-labeled } 2](NO_3)$  in  $D_2O$  (pD 5). (e) The signal at  $m/z$  544.2 for  $[D\text{-labeled } 2 - D_2O]^+$ . (f) Calculated isotopic distribution for  $[D\text{-labeled } 2 - D_2O]^+$ .

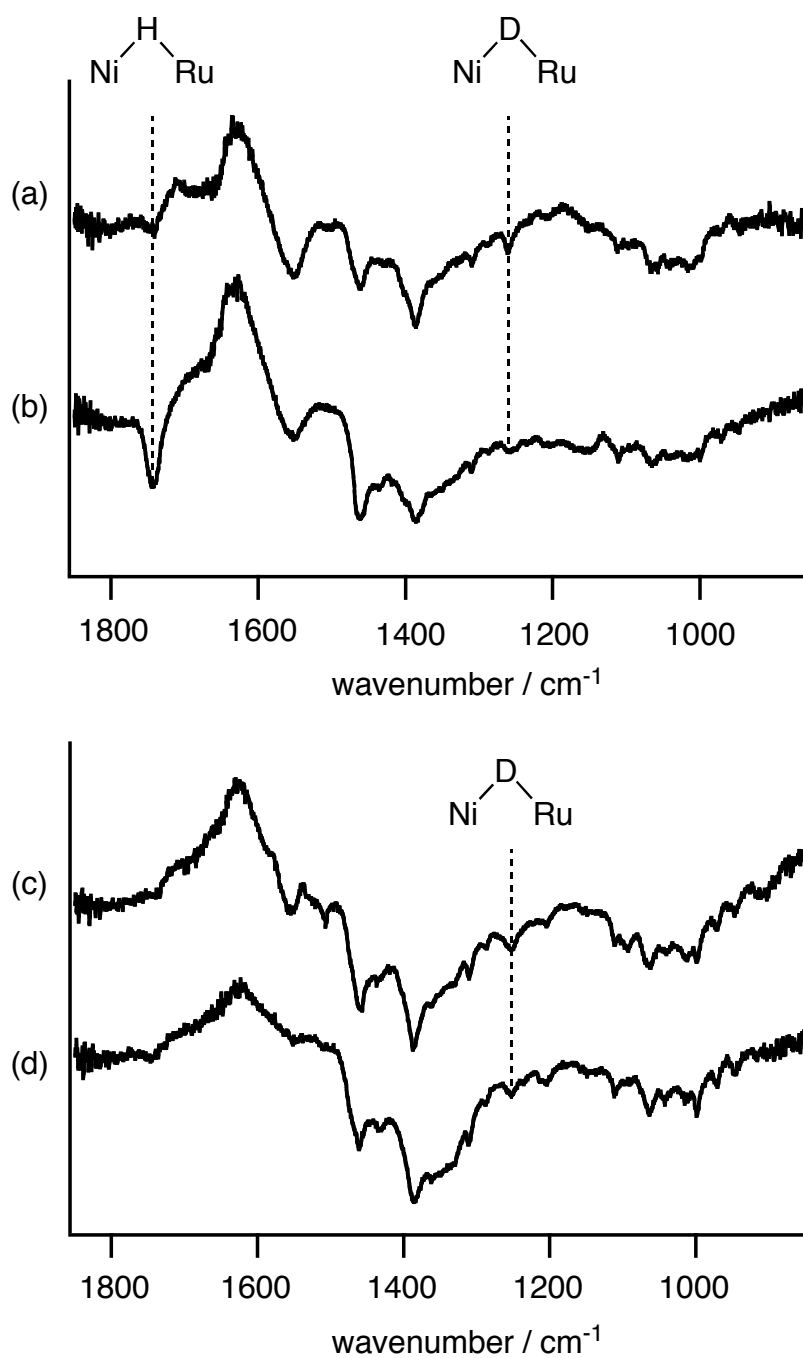

**Fig. S2.** IR spectrum of D-labeled **2** (50 mM) in H<sub>2</sub>O at pH 4.0 at 23 °C for (a) 0 h and (b) 1 h. The spectrum of H<sub>2</sub>O (pH 4.0 at 23 °C) was measured as the background. IR spectrum of D-labeled **2** (50 mM) in H<sub>2</sub>O at pH 8.0 at 23 °C for (c) 0 h and (d) 1 h. The spectrum of H<sub>2</sub>O (pH 8.0 at 23 °C) was measured as the background. The IR spectra were recorded on Thermo Nicolet NEXUS 8700 FT-IR instrument (ATR system) from 650 to 4000 cm<sup>-1</sup> using 2 cm<sup>-1</sup> standard resolution.

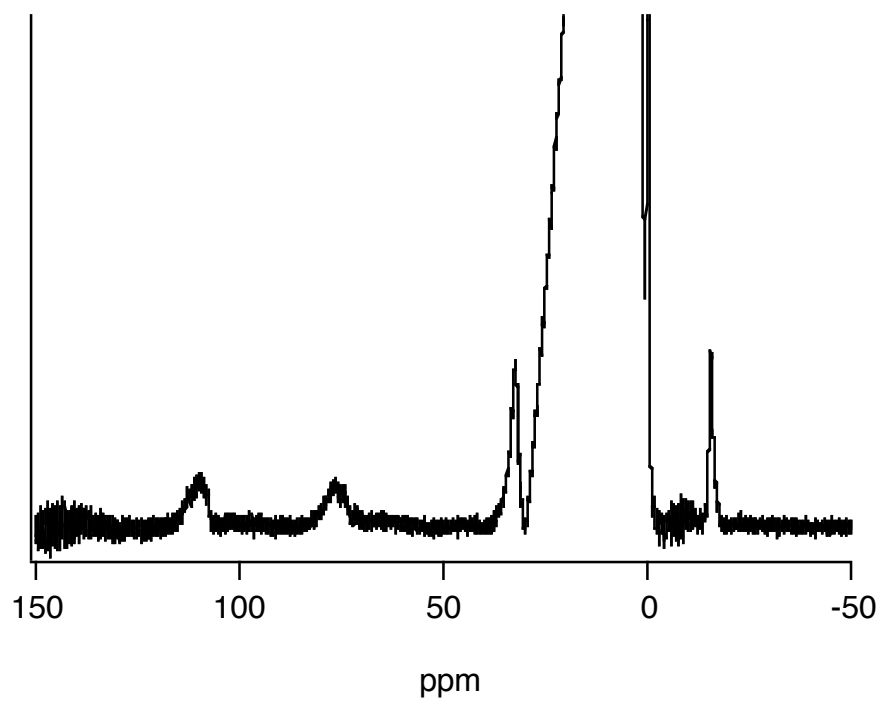

**Fig. S3.**  $^1\text{H}$  NMR spectrum of **4** in  $\text{H}_2\text{O}$  at pH 9 at 23 °C.

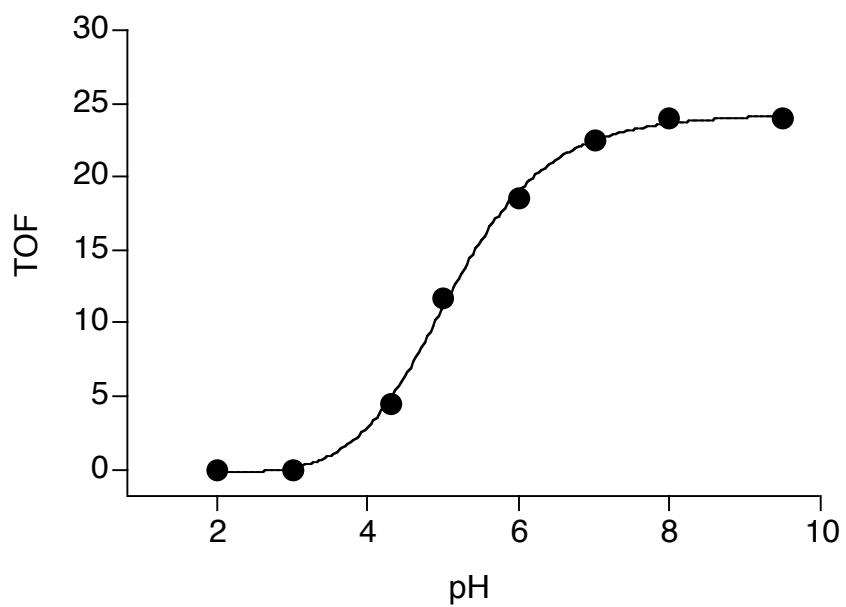

**Fig. S4.** pH-dependent profile of TOFs for the hydrogenation of glyoxylic acid (250  $\mu\text{mol}$ ) with **4** (5  $\mu\text{mol}$ ) and  $\text{H}_2$  (0.5 MPa) in water (2 mL) at 60  $^\circ\text{C}$  for 1 h.

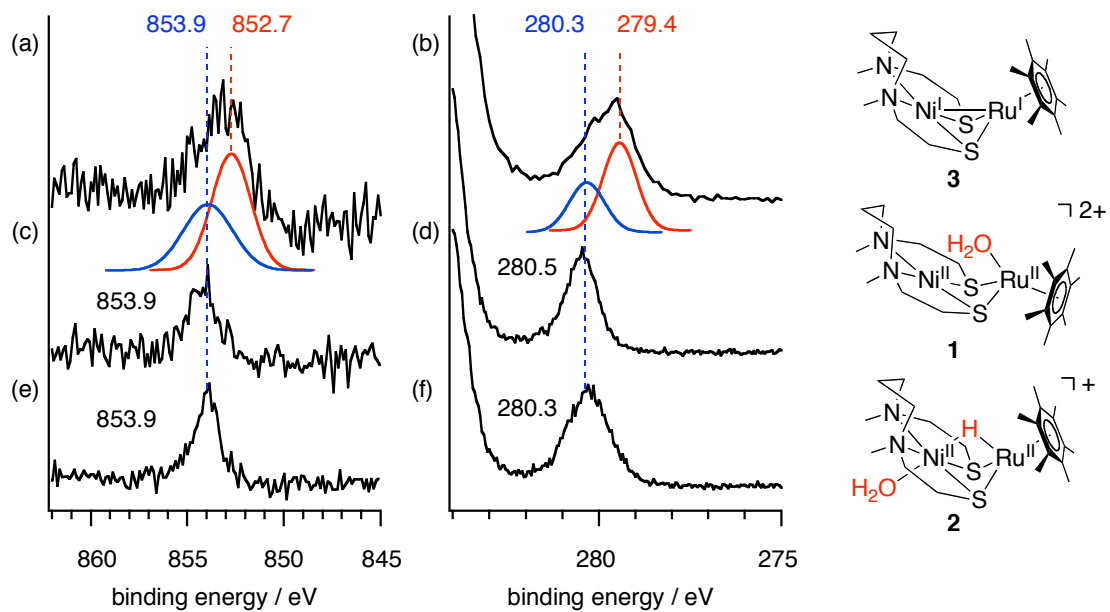

**Fig. S5.** (a) XPS of Ni 2*p* region for **3**. (b) XPS of Ru 3*d* region for **3**. (c) XPS of Ni 2*p* region for **1**. (d) XPS of Ru 3*d* region for **1**. (e) XPS of Ni 2*p* region for **2**. (f) XPS of Ru 3*d* region for **2**.
